# Supplementary material for: Intracellular Degradation of SARS-CoV-2 N-Protein Caused by Modular Nanotransporters Containing Anti-N-Protein Monobody and a Sequence That Recruits the Keap1 E3 Ligase
Source: MDPI journal article supplement (doi:10.3390/pharmaceutics16010004), 2023-12-19
Supplement: s1 [file s1]

### Supplementary Materials:

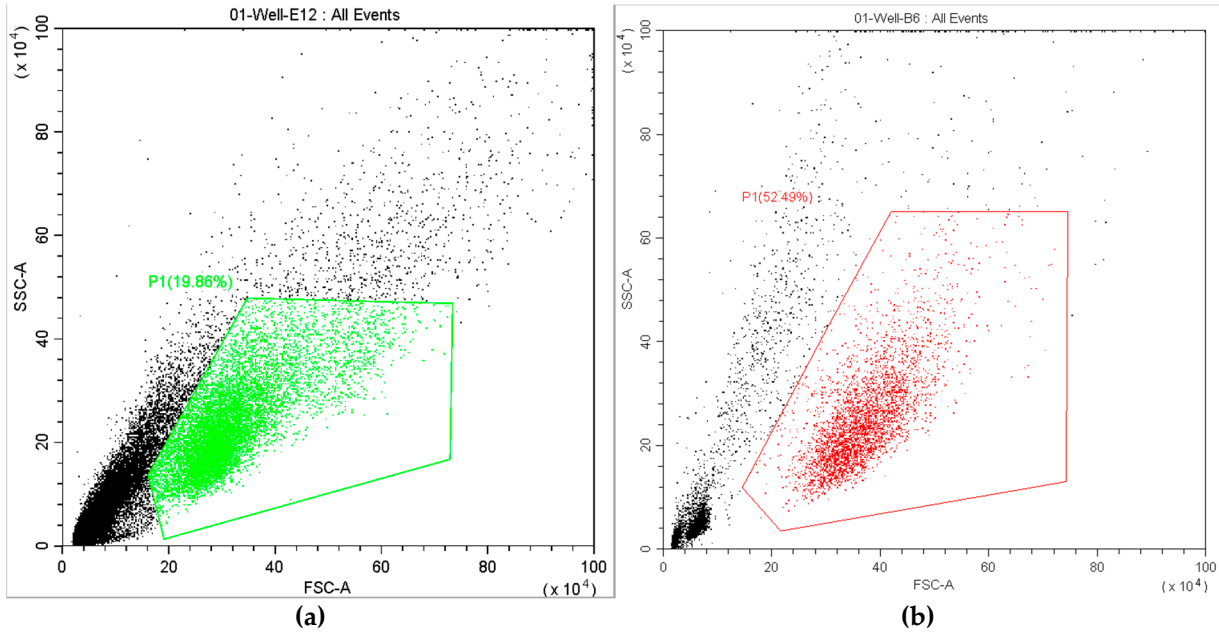

**Figure S1.** Analysis of A431 (a) and A549 (b) cells stably transfected with plasmid coding for N-protein fused to the fluorescent protein mRuby3 using SSC/FSC. FSC correlates with the cell volume while SSC correlates with a granularity of the cell. The areas from which cells were taken for subsequent analysis are shown. A total of 10000–50000 events were acquired for analysis.

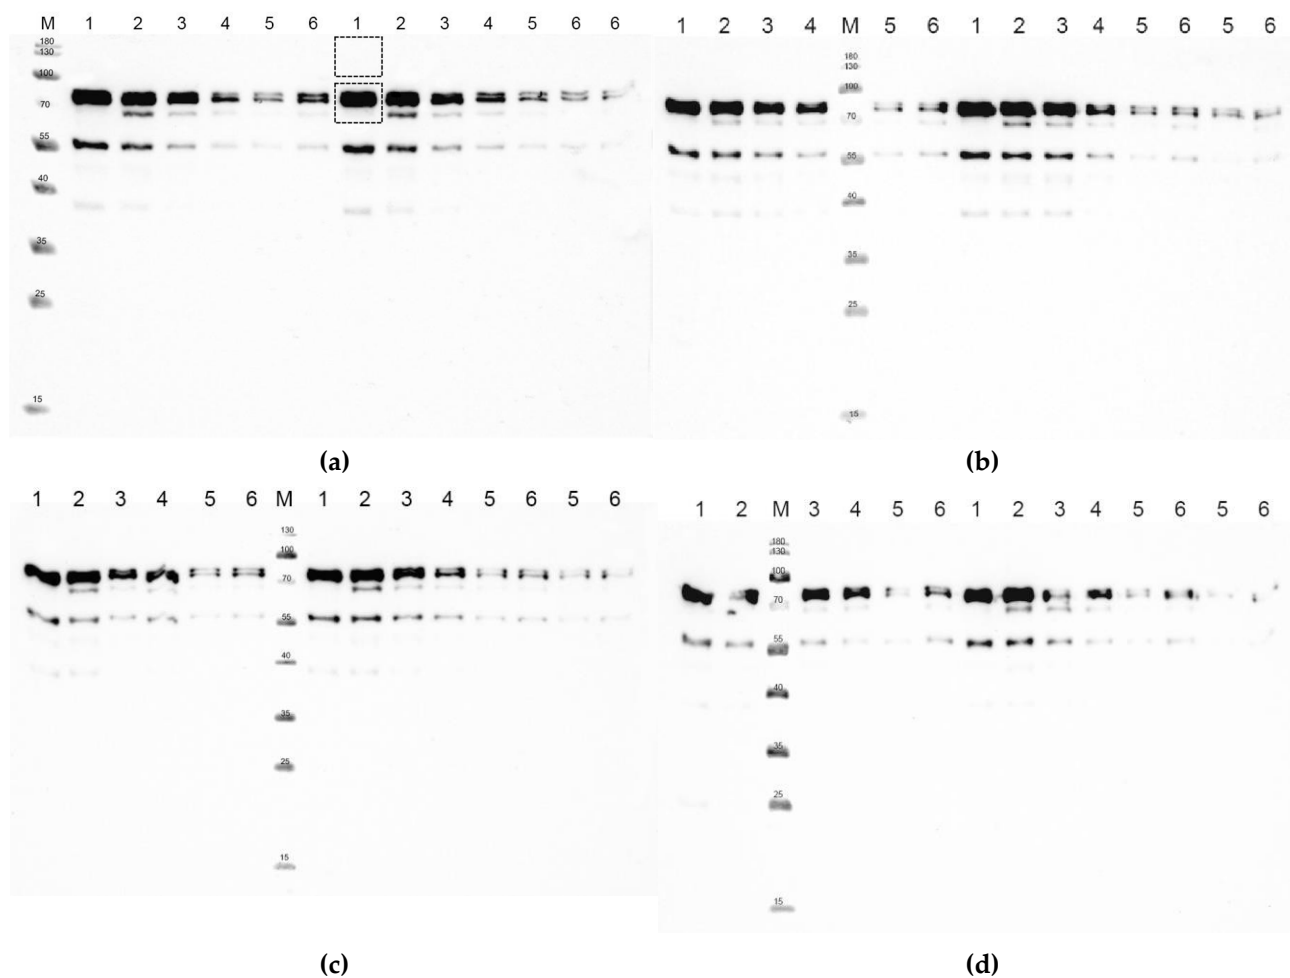

**Figure S2.** Western blot with N-protein antibodies for lysates of A431 cells stably transfected with plasmid coding for N-protein fused to the fluorescent protein mRuby3. The dotted line shows the area in which the intensities for the studied sample and for the background were determined. Samples shown: 1—A431 cells to which MNT was not added, 2—A431 cells that were incubated with 500 nM MHT<sub>1</sub> for 15 hours, 3—A431 cells that were incubated with 500 nM MHT<sub>1</sub> for 24 hours, 4—A431 cells that were incubated with 500 nM MHT<sub>1</sub> for 39 hours, 5—A431 cells that were incubated with 500 nM MHT<sub>1</sub> for 48 hours, 6—A431 cells that were incubated with 500 nM MHT<sub>0</sub> for 48 hours, M—marker of molecular mass in kDa.

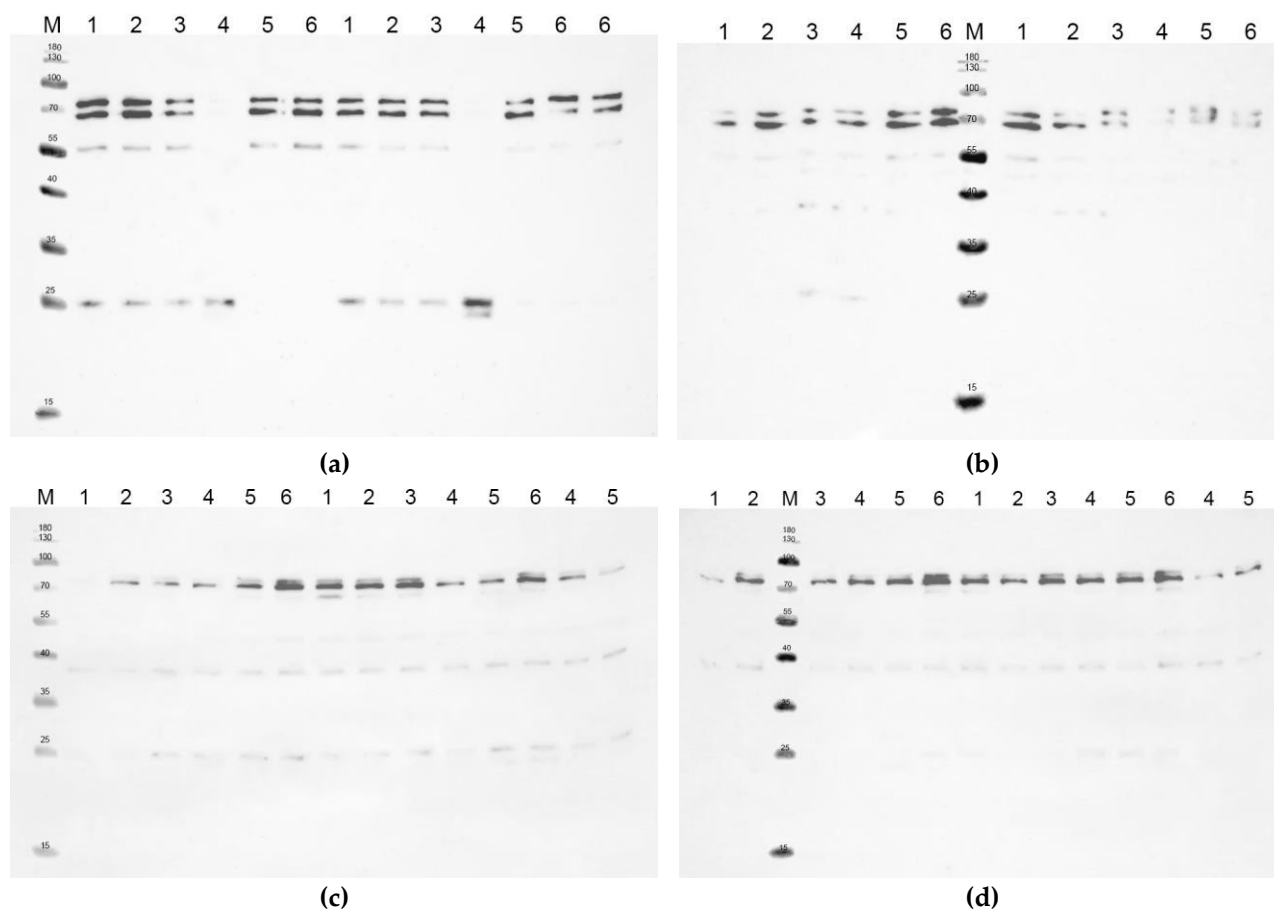

**Figure S3.** Western blot with N-protein antibodies for lysates of A549 cells stably transfected with plasmid coding for N-protein fused to the fluorescent protein mRuby3. Samples shown: 1—A549 cells to which MNT was not added, 2—A549 cells that were incubated with 500 nM MHT<sub>1</sub> for 15 hours, 3—A549 cells that were incubated with 500 nM MHT<sub>1</sub> for 24 hours, 4—A549 cells that were incubated with 500 nM MHT<sub>1</sub> for 39 hours, 5—A549 cells that were incubated with 500 nM MHT<sub>1</sub> for 48 hours, 6—A549 cells that were incubated with 500 nM MHT<sub>0</sub> for 48 hours, M—marker of molecular mass in kDa.

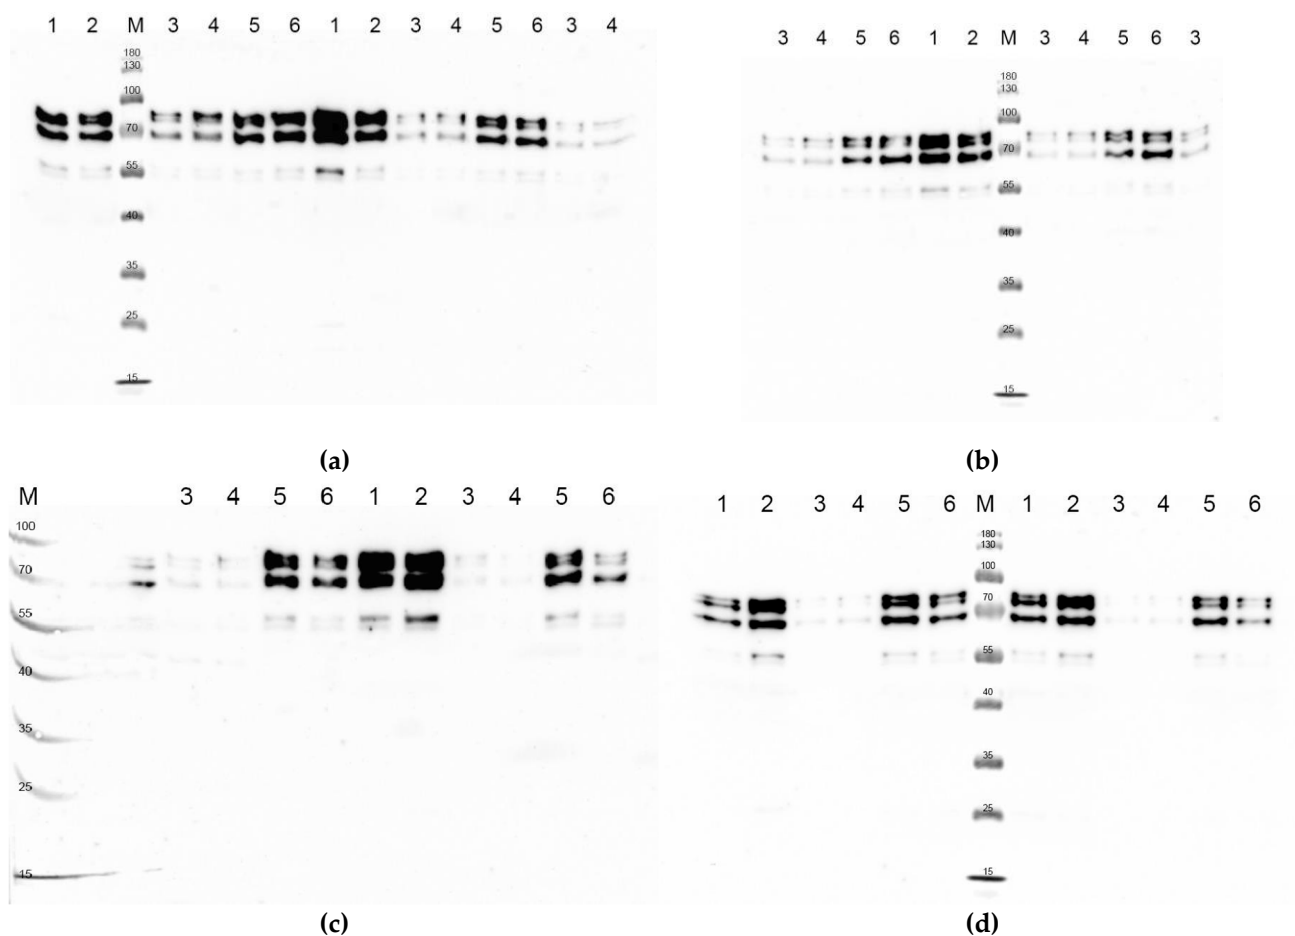

**Figure S4.** Western blot with N-protein antibodies for lysates of A431 cells stably transfected with plasmid coding for N-protein fused to the fluorescent protein mRuby3. Samples shown: 1—A431 cells to which MNT<sub>1</sub> and inhibitors were not added, 2—A431 cells that were incubated with 500 nM MHT<sub>1</sub> for 24 hours, 3—A431 cells that were incubated with 5  $\mu$ M MG132 for 24 hours, 4—A431 cells that were incubated with 500 nM MHT<sub>1</sub> and 5  $\mu$ M MG132 for 24 hours, 5—A431 cells that were incubated with 100 nM Bafilomycin A1 for 24 hours, 6—A431 cells that were incubated with 500 nM MHT<sub>1</sub> and 100 nM Bafilomycin A1 for 24 hours, M—marker of molecular mass in kDa.
